# Supplementary material
Source: PubMed Central journal article supplement (PMC3057837)
Supplement: supp_M110.182618_SupplFigS1.pdf [file supp_M110.182618_SupplFigS1.pdf]

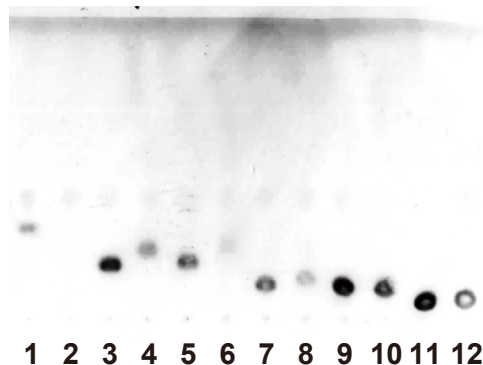

**Supplemental Fig. S1. Degradation of various unsaturated heparin disaccharide by UGL.** Unsaturated heparin disaccharides were incubated at 30°C with SagUGL and resultant products were detected on the TLC plate. *Lane 1*, sulfate-free unsaturated heparin disaccharide (H $\Delta$ 0S, 17.5 nmol); *lane 2*, H $\Delta$ 0S (17.5 nmol) with SagUGL; *lane 3*, unsaturated heparin disaccharide with a sulfate group at nitrogen position of GlcN residue (H $\Delta$ NS, 17.5 nmol); *lane 4*, H $\Delta$ NS (17.5 nmol) with SagUGL; *lane 5*, unsaturated heparin disaccharide with a sulfate group at C-6 position of GlcNAc residue (H $\Delta$ 6S, 17.5 nmol); *lane 6*, H $\Delta$ 6S (17.5 nmol) with SagUGL; *lane 7*, unsaturated heparin disaccharide with sulfate groups at nitrogen position and C-6 position of GlcN residue (H $\Delta$ NS6S, 17.5 nmol); *lane 8*, H $\Delta$ NS6S (17.5 nmol) with SagUGL; *lane 9*, unsaturated heparin disaccharide with sulfate groups at C-2 position of  $\Delta$ GlcA residue and nitrogen position of GlcN residue (H $\Delta$ NS2' S, 17.5 nmol); *lane 10*, H $\Delta$ NS2' S (17.5 nmol) with SagUGL; *lane 11*, unsaturated heparin disaccharide with sulfate groups at C-2 position of  $\Delta$ GlcA residue, nitrogen position of GlcN residue, and C-6 position of GlcN residue (H $\Delta$ NS6S2' S, 17.5 nmol), *lane 12*, H $\Delta$ NS6S2' S (17.5 nmol) with SagUGL.
