# Supplementary material
Source: PubMed Central journal article supplement (PMC3057837)
Supplement: supp_M110.182618_SupplFigS2.pdf [file supp_M110.182618_SupplFigS2.pdf]

```

S. agalactiae      -MMKIKPVKVESIENPKRFLNSRLLTKIEVEEAIEKALKQLYINIDYFGEEYPTPATFNN
C. perfringens    ---MIKEIRVEEIAKKDEFLLKTLTRAEVKNAIDLVIKQIDANMEYFKEKFPSSATKNN
E. faecalis       ----MKKITQEKLLSSERFFGGQILTEDFIDQSIDKVLKKEKNIQKLGDKFPTPATDNN
E. rhusiopathiae MEKHKIQVTEPIRIDIDIFKNATLLTKEEVKQAIEDTIKKIDLNMEHIGERFPWSATKDL
M. fermentans     ---MVFRNLNNSLIYEKEFNDDTKLLTKEEIKKALDLIIKQVDQNIIDYFGKEFMIAANTFNN
Bacillus          -----MWQQAIGDALGITARNLKKFGDRFPHVSDGSN
                                     . : : : : * : . : . : .
                                     ↓           ↓
S. agalactiae      IYKVMDNTEWTFNGFWTGLWLALEYNQDKKLNIAHKNVLSFLNRINNRALDHHDLGFL
C. perfringens    QYGIIEINIEWTDGFWTGLLWLALEYTGDEKYRELADKNVASFKNRVEKDIELDHHDLGFL
E. faecalis       TYIAMDNTEWTFNGFWTGILWLCYEVSGEKHYREVAEQNVKSFYIRIENIEIEVEHDLGFL
E. rhusiopathiae KYPIIDNIEWTDGFWTGLLWLALEYTGDEKYRELADKNVDSFHHRVVDNIEIDHHDLGFL
M. fermentans     KYQKIYSSEWTDGFWTGILWLALEYTNNNKYKELALEHVKWKYKRIKEKILVDHDMGFL
Bacillus          KYVLNDNTDWTDFWGSILWLCYETGDEQYREGAVRTVASFRERLDRFENLDDHHDIGFL
* . : ** : ** : * * * . ** . : : : : * . * : * : . : : ** : **
                                     ↓
S. agalactiae      YTPSCTAEYRINGDVKALEATIKAADKLMERYQEKGGFIQAWGELGYKEH-YRLIIDCLL
C. perfringens    YSLATVSGYKLTGSEDAREASIKAANKLISRYQEKGEFIQAWGELGSKDH-YRFIIDCLL
E. faecalis       YSLSCVSAYKLTGNEAAKNAASIAAEKLLQRYQSKGEFIQAWGELGNQDN-YRLIVDCLL
E. rhusiopathiae YSLSCVASYKLTGSEKAKEAAVLAADKLITRWQEKGEFIQAWGEYNNPEH-YRFIIDCLL
M. fermentans     YSPSCVAAYKLTKNQEAKEAALLAADNLIISRYQEKGEFIQAWGNIGANDN-YRLIIDCLL
Bacillus          YLSLAKAQWIVEKDESARKLALDAADVLMRRWRADAGIIQAWGPKGDPENGGRIIIDCLL
* : : : : . * : : : ** : * : * : . . : ** * . : : * : ** *
                                     ↓ ↓ ↓
S. agalactiae      NIQLLFFAYEQTGDEKYRQVAVNHFYASANNVVRDDSSAFHTFYFDPETGEPLKGVTR
C. perfringens    NIPLLYWASDETDGAKYRNIAKHFVTSCTNNVIRDDASAFHTFYMDNETGKPLRGVTR
E. faecalis       NIPLLFWASTVTQDKRYREVAVKHYHTTIDNAIREDSSAYHTFFFDAETGDPYLGKTR
E. rhusiopathiae NIPLLYWATEVTGDDKYANIAERHFYTSQYVIRDDASAFHTFYMDPETGGPVRGATR
M. fermentans     NIPLLYWASDYDR-KNYFDKALNHFNLSLHTVIREDDGTYHTYFFDAKTNKPLCGKTR
Bacillus          NLPLLLWAGEQTGDPEYRRVAEAHALKSRRLVIRGDDSSYHTFYFDPENGNAIRGGTH
* : * * : * . * * * : : * * : : ** : * : * : . . : * * :
                                     ↓ ↓
S. agalactiae      QGYSDESSWARGQAWGIYGIPLSYRKMMDYQ-----QIILFKGMTNYFLNRLPKD-KVSY
C. perfringens    QGYSDDSAWARGQAWGVYGIPLNYRYTRNES-----CFNLYEGMTNYFLNRLPKD-NVCY
E. faecalis       QGYSDDSSWARGQSWLIYGLALFRSYCPREE-----NTEIFEAITNYFLNRLPKD-FVSY
E. rhusiopathiae QGYNDESSWARGQAWGVYGIPLNYRYTHEDE-----VFPLHEGTMNYFLNRLPKD-FVCY
M. fermentans     QGYSDDSCWARGQAWGIYGIPLTLKYAKNNSKIDKNAYQIYQKVLNQLFNNLPQDDYVVCY
Bacillus          QGNTDGTWTRGQAWGIYGFALNSRYLGNAD-----LLETAKRMARHFARVPED-GVVY
** . * * * : ** : * : ** : * : . : : : : * * . : * * * *
                                     ↓
S. agalactiae      WDLIFTDGSQPRDTSATATAVCGIHEMLKYLPEVDPDKETYKYAMHTLRLSLIEQYSNN
C. perfringens    WDLIFNDGDHDSKSSAAAIAVCGMHMKNKYLPEVDENKEVYKYAMHNLRLSMENYMN
E. faecalis       WDLIFMDGSEQSRDTSATAIAVCGMSLMDAFLPETNSHKLKYKCAQHSLRLSLENYTES
E. rhusiopathiae WDLIFTDGDQSRDSSAAAIAVCGMLEMIKYMKN-DELKTVYEGASHTILRLSLIDNYTKT
M. fermentans     WDLIFNEKADQSRDSSASAIACGLEMLKITQK-DYKTDLYEKSAHLILRLINKYHNK
Bacillus          WDFEVPQEPSSYRDSSASAITACGLEIASQLDESPPERQRFIDAAKTTVTALRDGYAER
** : . : : : * : ** : * : ** : : : : : : : : : * : * :
                                     ↓
S. agalactiae      ELIAGRPLLLHGVY S WH S G K GVDEGNIWGDYFFLEALIRFYK-DWELYW-----
C. perfringens    EIEPGKPVLLHGVY S WH S G K GVDEGNIWGDYFFLEALIRFYK-DWNLYW-----
E. faecalis       KTDGITALLNEGVY S WH S G K GVNEGNIWGDYFFLEALVRFKK-NWKMYW-----
E. rhusiopathiae THEPGNPVLYHGVY S WH S G K GVDEGNIWGDYFFLEALMRLYK-DWELYW-----
M. fermentans     KIEPGTPILLHGVY S WH S K K GVDEGNIWGDYFFLEALMRLYKDWPNFYW-----
Bacillus          DDGEAEGFIRRGYSY H VR G G I SPDDYTIWGDYFFLEALLRLER-GVTGYWYERGR
. . : * * : . . : : . ** * : : ** : * : . . * *

```

**Supplemental Fig. S2. Multiple sequence-alignment of bacterial UGLs.** Bacteria with UGL genes were as follows: *S. agalactiae*, *Streptococcus agalactiae* NEM 316; *C. perfringens*, *Clostridium perfringens* ATCC 13124; *E. faecalis*, *Enterococcus faecalis* V583; *E. rhusiopathiae*, *Erysipelothrix rhusiopathiae* ATCC 19414; *M. fermentans*, *Mycoplasma fermentans* PG18; and *Bacillus*, *Bacillus* sp. GL1. The motif “R-/-SXX(S)XK” responsible for recognition of the sulfate groups of Δ6S and Δ4S is boxed. Other residues binding to the substrate are indicated by arrows. Identical and similar amino acid residues among proteins are denoted by asterisks and dots, respectively.
