# Supplementary material
Source: PubMed Central journal article supplement (PMC3057837)
Supplement: supp_M110.182618_SupplTable1.pdf [file supp_M110.182618_SupplTable1.pdf]

**Supplemental Table S1**  
**Primers for site-directed mutagenesis**

| SagUGL      |           |                                                                  |
|-------------|-----------|------------------------------------------------------------------|
| T235A       | sense     | 5'- CCGTT AAAAG GTGTC <u>GCACG</u> ACAGG GTTAT AG -3'            |
|             | antisense | 5'- CTATA ACCCT GTCGT <u>GCGAC</u> ACCTT TTAAC GG -3'            |
| S365H       | sense     | 5'- CTATT GCACG GTGTG TATCA <u>TTGGC</u> ATTCA GGTAA AGGAG -3'   |
|             | antisense | 5'- CTCCT TTACC TGAAT GCCAA <u>TGATA</u> CACAC CGTGC AATAG -3'   |
| S368G       | sense     | 5'- CGGTG TGTAT TCGTG GCATG <u>GAGGT</u> AAAGG AGTAG ATGAA G -3' |
|             | antisense | 5'- CTTCA TCTAC TCCTT TACCT <u>CCATG</u> CCACG AATAC ACACC G -3' |
| K370I       | sense     | 5'- CGTGG CATTG AGGTA <u>TAGGA</u> GTAGA TGAAG GTAAT ATTTG -3'   |
|             | antisense | 5'- CAAAT ATTAC CTTC A TCTAC TCCTA <u>TACCT</u> GAATG CCACG -3'  |
| BacillusUGL |           |                                                                  |
| H210R       | sense     | 5'-CATCC GCGGC GGCAC <u>GCGCC</u> AGGGC AACAC CGACG GC-3'        |
|             | antisense | 5'-GCCGT CGGTG TTGCC CTG <u>GC</u> GCGTG CCGCC GCGGA TG-3'       |
| H339S       | sense     | 5'- CTTCA TCCGC CGCGG CTCCT AT <u>TCT</u> GTGCG CGGCG GCATC -3'  |
|             | antisense | 5'- GATGC CGCCG CGCAC <u>AGAAT</u> AGGAG CCGCG GCGGA TGAAG -3'   |
| G342S       | sense     | 5'- CTATC ACGTG CGC <u>AG</u> TGGCA TCTCG CCCGA CGACT ACAC -3'   |
|             | antisense | 5'- GTGTA GTCGT CGGGC GAGAT GCC <u>AC</u> TGC GC AC GTG ATAG -3' |
| I344K       | sense     | 5'- CTATC ACGTG CGCGG CGGC <u>AA</u> TCG CCCGA CGACT ACACG -3'   |
|             | antisense | 5'- CGTGT AGTCG TCGGG CGAT <u>T</u> TGCCG CCGCG CACGT GATAG -3'  |

Underline indicates the mutation site.
