# Supplementary material
Source: PubMed Central journal article supplement (PMC3057837)
Supplement: supp_M110.182618_SupplTable2.pdf [file supp_M110.182618_SupplTable2.pdf]

**Supplemental Table S2**  
**Data collection and refinement statistics**

|                                                | WT                                                                    | D175N                                                                 | D175N-Δ6S                                                             |
|------------------------------------------------|-----------------------------------------------------------------------|-----------------------------------------------------------------------|-----------------------------------------------------------------------|
| <b>Space group</b>                             | <i>C</i> 2                                                            | <i>C</i> 2                                                            | <i>C</i> 2                                                            |
| <b>Unit cell parameters (Å, deg)</b>           | <i>a</i> = 104.8, <i>b</i> = 53.2,<br><i>c</i> = 70.1, $\beta$ = 96.6 | <i>a</i> = 105.1, <i>b</i> = 53.4,<br><i>c</i> = 70.2, $\beta$ = 96.5 | <i>a</i> = 105.2, <i>b</i> = 53.3,<br><i>c</i> = 70.1, $\beta$ = 96.6 |
| <b>Data collection</b>                         |                                                                       |                                                                       |                                                                       |
| Wavelength (Å)                                 | 1.0000                                                                | 1.0000                                                                | 1.0000                                                                |
| Resolution limit (last shell) <sup>a</sup> (Å) | 50-1.95 (2.02-1.95)                                                   | 30-2.50 (2.59-2.50)                                                   | 20-2.02 (2.09-2.02)                                                   |
| Measured reflections                           | 103,030                                                               | 50,235                                                                | 96,246                                                                |
| Unique reflections                             | 28,120 (2,595)                                                        | 13,575 (1,323)                                                        | 25,199 (2,470)                                                        |
| Redundancy                                     | 3.7 (3.1)                                                             | 3.7 (3.8)                                                             | 3.8 (3.8)                                                             |
| Completeness (%)                               | 99.0 (91.9)                                                           | 99.0 (98.4)                                                           | 98.4 (97.7)                                                           |
| <i>I</i> / $\sigma$ ( <i>I</i> )               | 16.9 (2.62)                                                           | 21.5 (4.90)                                                           | 19.3 (4.30)                                                           |
| <i>R</i> <sub>merge</sub> (%)                  | 0.060 (0.29)                                                          | 0.064 (0.35)                                                          | 0.071 (0.38)                                                          |
| <b>Refinement</b>                              |                                                                       |                                                                       |                                                                       |
| Resolution limit (Å)                           | 50-1.95 (2.00-1.95)                                                   | 50-2.50 (2.56-2.50)                                                   | 20-2.02 (2.07-2.02)                                                   |
| Used reflections                               | 26,428 (1,733)                                                        | 12769 (925)                                                           | 23,909 (1,696)                                                        |
| Completeness (%)                               | 98.8 (89.5)                                                           | 98.9 (98.1)                                                           | 98.3 (96.4)                                                           |
| <i>R</i> -factor (%)                           | 18.9 (23.8)                                                           | 18.7 (21.5)                                                           | 17.4 (19.4)                                                           |
| <i>R</i> <sub>free</sub> (%)                   | 21.3 (29.6)                                                           | 26.0 (31.6)                                                           | 20.9 (26.7)                                                           |
| <b>Final model</b>                             |                                                                       |                                                                       |                                                                       |
| No. of molecules<br>/asymmetric unit           | 1                                                                     | 1                                                                     | 1                                                                     |
| No. of nonhydrogen atoms                       |                                                                       |                                                                       |                                                                       |
| Protein                                        | 3,250                                                                 | 3,218                                                                 | 3,206                                                                 |
| Δ6S                                            | 0                                                                     | 0                                                                     | 30                                                                    |
| H <sub>2</sub> O                               | 109                                                                   | 61                                                                    | 160                                                                   |
| Average <i>B</i> -factor (Å <sup>2</sup> )     |                                                                       |                                                                       |                                                                       |
| Protein                                        | 25.9                                                                  | 35.8                                                                  | 21.9                                                                  |
| H <sub>2</sub> O                               | 28.7                                                                  | 31.6                                                                  | 33.5                                                                  |
| Δ6S                                            |                                                                       |                                                                       | 42.6                                                                  |
| r.m.s.d. from ideal                            |                                                                       |                                                                       |                                                                       |
| Bond length (Å)                                | 0.007                                                                 | 0.008                                                                 | 0.007                                                                 |
| Bond Angle (deg)                               | 0.957                                                                 | 1.002                                                                 | 0.997                                                                 |
| Ramachandran plot (%)                          |                                                                       |                                                                       |                                                                       |
| Favored region                                 | 91.4                                                                  | 91.2                                                                  | 90.2                                                                  |
| Allowed region                                 | 8.6                                                                   | 8.8                                                                   | 9.8                                                                   |
| Outlier region                                 | 0                                                                     | 0                                                                     | 0                                                                     |

<sup>a</sup> Data in highest resolution shells are given in parentheses.
